# Supplementary material for: Malarial parasite diversity in chimpanzees: the value of comparative approaches to ascertain the evolution of Plasmodium falciparum antigens
Source: PubMed Central journal article supplement (PMC3848613; doi:10.1186/1475-2875-12-328), 2013-09-17
Supplement: 1475-2875-12-328-S5.pdf [file 1475-2875-12-328-S5.pdf]

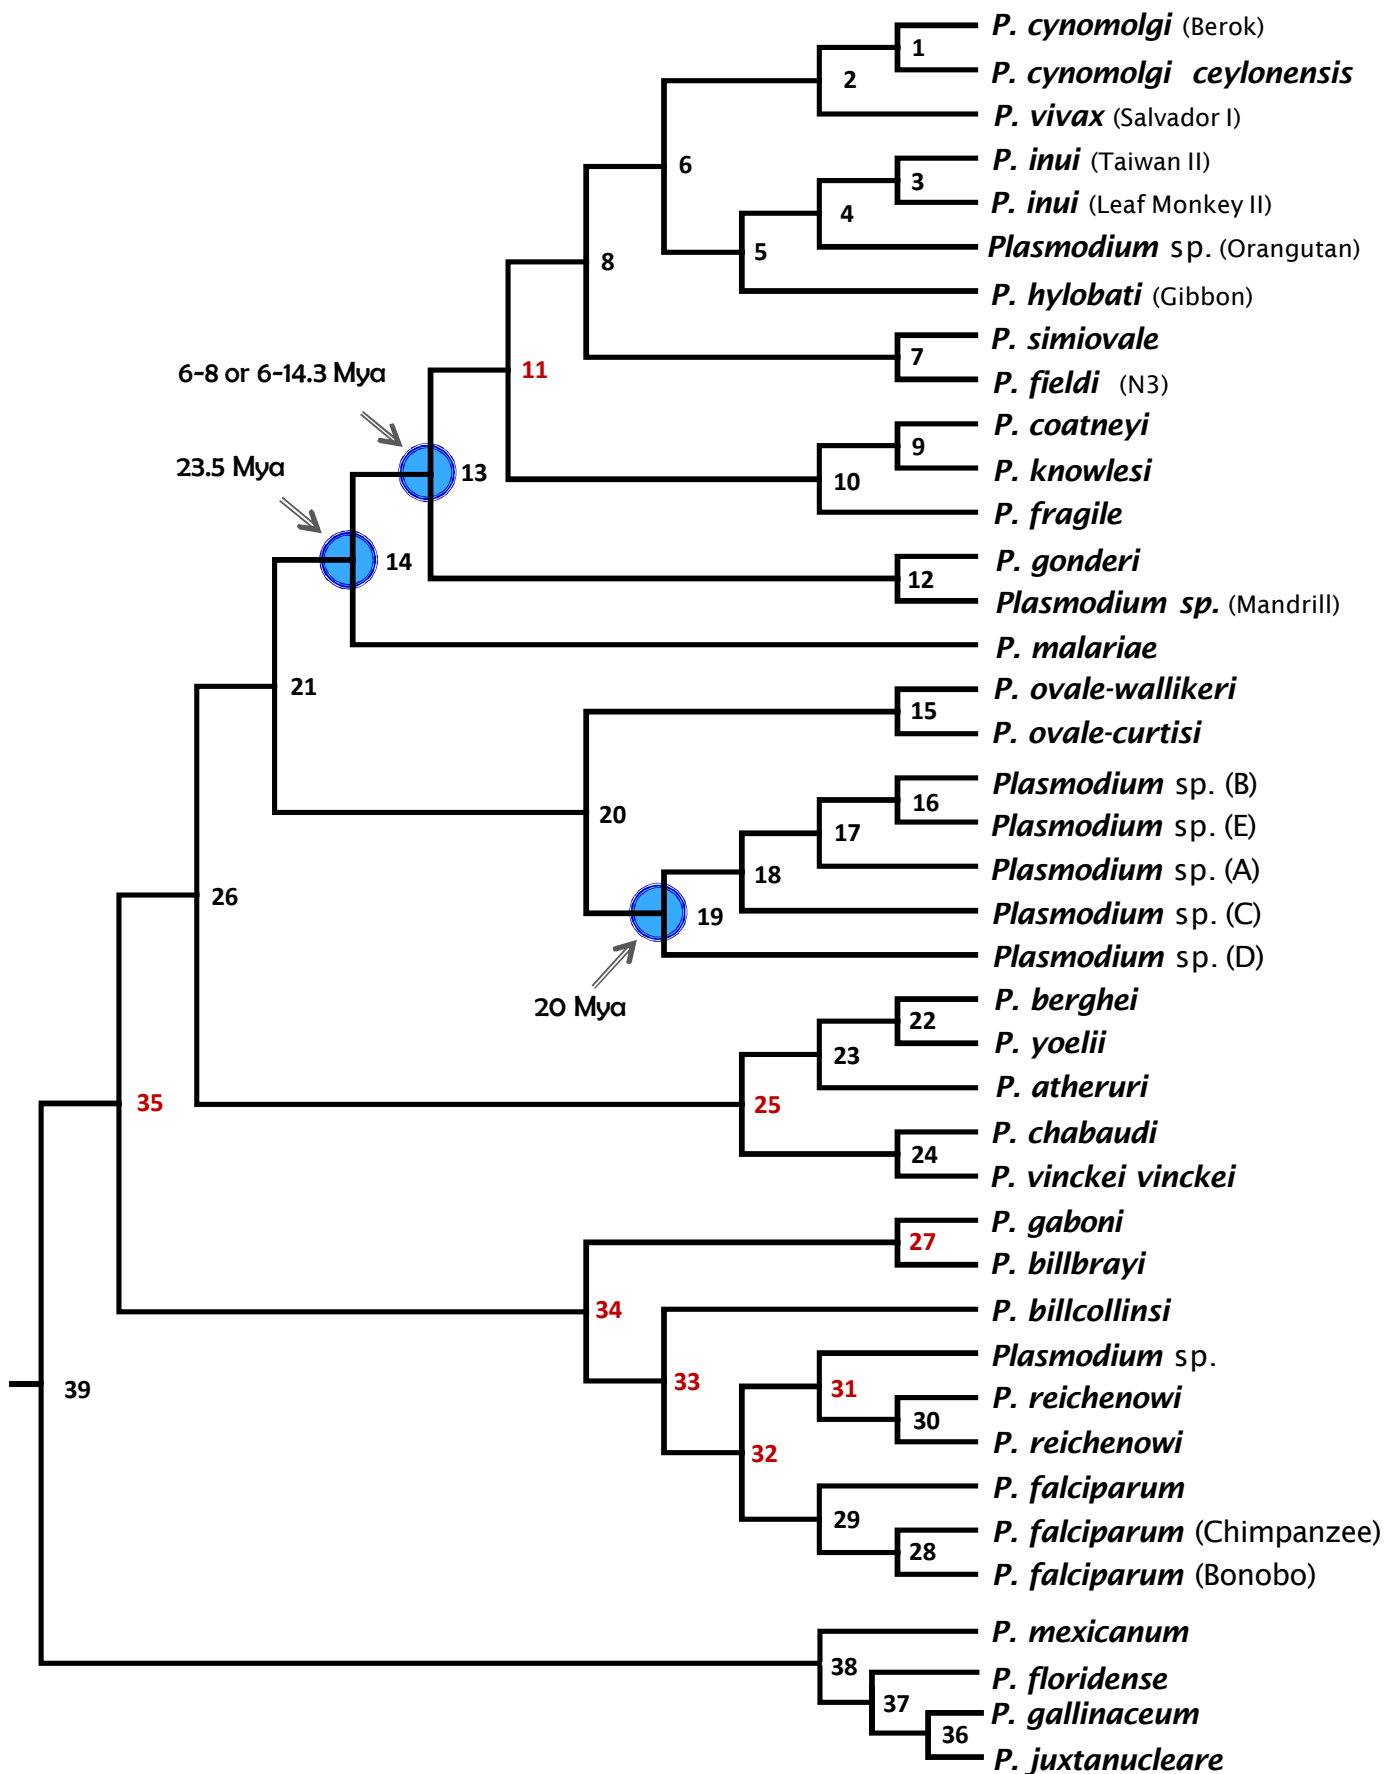

Additional file 5. BEAST node numbers for the *Plasmodium* phylogeny as used in Table 2.
